# Supplementary material for: Genome-Wide Association Study of Body Conformation Traits in Tashi Goats (Capra hircus)
Source: MDPI journal article supplement (doi:10.3390/ani14081145), 2024-04-09
Supplement: s1 [file s1]

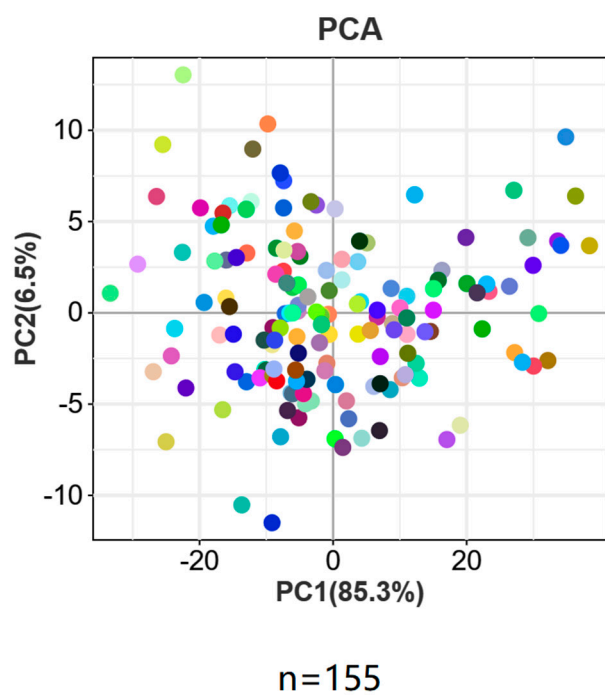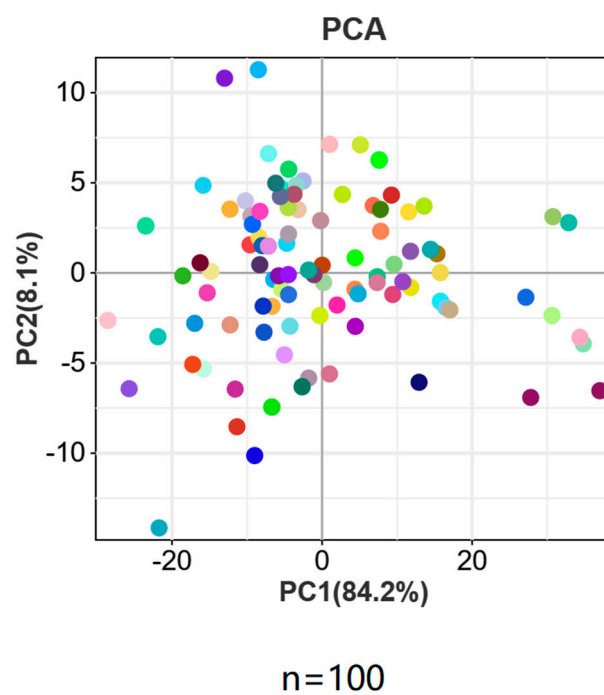

**Figure S1. The PCA score plots based on phenotypical data**

(A) The 155 Tashi goats; (B) The 100 Tashi goats used in genome-wide sequencing;

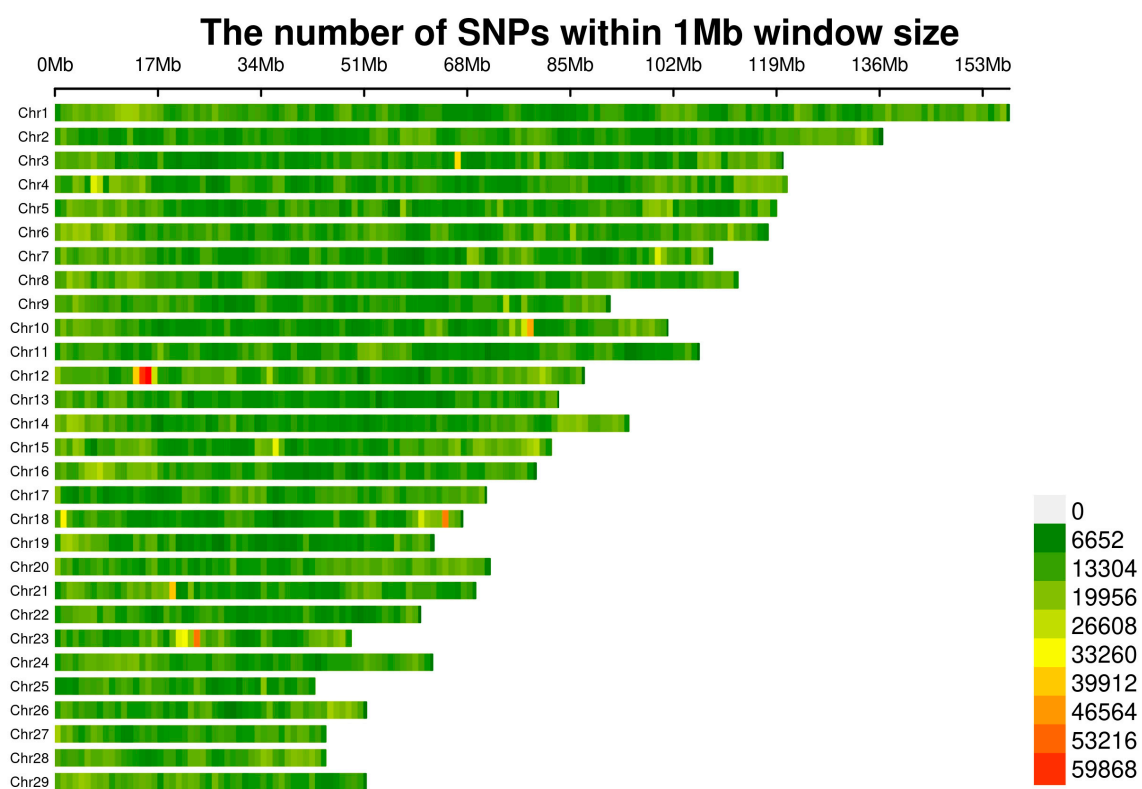

**Figure S2. Distribution of SNP density throughout the genome.**

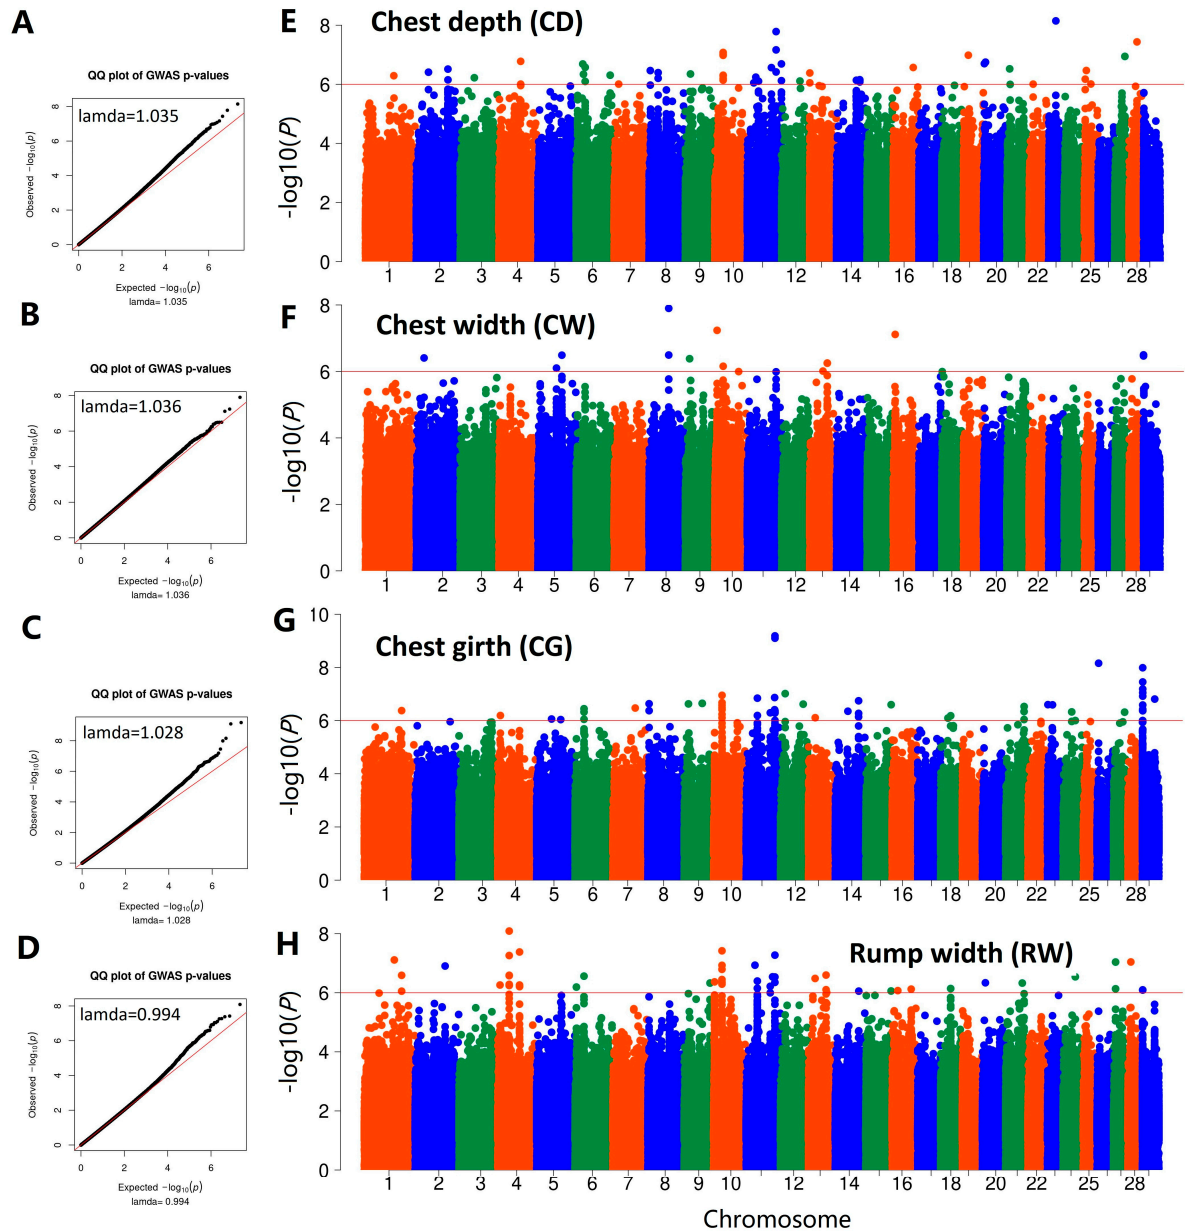

**Figure S3. The Manhattan plots of four body conformation traits in Tashi goats**

The QQ plots of the GWAS results for Chest depth (A), Chest width (B), Chest girth (C), and Rump width (D); The Manhattan plots of GWAS results for Chest depth (E), Chest width (F), Chest girth (G), and Rump width (H).
