# Supplementary material for: Genome-Wide Association Study of Body Conformation Traits in Tashi Goats (Capra hircus)
Source: Animals (Basel). 2024 Apr 9;14(8):1145. doi: 10.3390/ani14081145 (PMC11047570; doi:10.3390/ani14081145)
Supplement: Supplementary file 1 [file animals-14-01145-s001.zip › Supplementary Table 1.xlsx]

## Sheet: Table S1
Table S1. The significant SNPs of eight body conformation traits and their annotation genes

## Sheet: BH
rs	chr	down_ps	up_ps	candidate.genes
NC_030818.1__89248733	11	88748733	89748733	;Metazoa_SRP;RNF144A;RSAD2;CMPK2
NC_030818.1__88216493	11	87716493	88716493	ASAP2;;MBOAT2;KIDINS220;;;
NC_030818.1__89248911	11	88748911	89748911	;Metazoa_SRP;RNF144A;RSAD2;CMPK2
NC_030814.1__69288917	7	68788917	69788917	;;;;;;OR2W3;TRIM58;;;OR6F1;OR13G1;5S_rRNA;;;OR2G3;;GCSAML;;;
NC_030832.1__22409647	25	21909647	22909647	CACNG3;RBBP6;;TNRC6A;SLC5A11;ARHGAP17;LCMT1;;AQP8;ZKSCAN2
NC_030831.1__12686968	24	12186968	13186968	;SERPINB8;;5S_rRNA;SYT4
NC_030818.1__89248159	11	88748159	89748159	;Metazoa_SRP;RNF144A;RSAD2;CMPK2
NC_030818.1__38899525	11	38399525	39399525	CCDC85A;
NC_030831.1__12694616	24	12194616	13194616	;SERPINB8;;5S_rRNA;SYT4
NC_030818.1__89242536	11	88742536	89742536	;Metazoa_SRP;RNF144A;RSAD2;CMPK2
NC_030814.1__56299884	7	55799884	56799884	NR3C1;;
NC_030818.1__89217910	11	88717910	89717910	;Metazoa_SRP;RNF144A;RSAD2;CMPK2
NC_030818.1__89214761	11	88714761	89714761	;Metazoa_SRP;RNF144A;RSAD2;CMPK2
NC_030818.1__88833042	11	88333042	89333042	;;Metazoa_SRP
NC_030830.1__1646959	23	1146959	2146959	GMDS;MYLK4;WRNIP1;SERPINB1;U1;SERPINB9;;;LY86;;
NC_030819.1__83505104	12	83005104	84005104	DIAPH3;
NC_030834.1__7746579	27	7246579	8246579	5S_rRNA;5S_rRNA;SH2D4A;CSGALNACT1;U1;U6;;INTS10;HGSNAT;POMK;;HOOK3;;RNF170;THAP1;CHRNA6;CHRNB3;U6;SMIM19
NC_030814.1__69312748	7	68812748	69812748	;;;;;;OR2W3;TRIM58;;;OR6F1;OR13G1;5S_rRNA;;;OR2G3;;GCSAML;;;
NC_030831.1__12686946	24	12186946	13186946	;SERPINB8;;5S_rRNA;SYT4
NC_030819.1__83477429	12	82977429	83977429	DIAPH3;
NC_030836.1__1143519	29	643519	1643519	;;SMCO4;DEUP1;SLC36A4;MTNR1B;
NC_030819.1__83502748	12	83002748	84002748	DIAPH3;
NC_030818.1__88840223	11	88340223	89340223	;;Metazoa_SRP
NC_030818.1__34732879	11	34232879	35232879
NC_030818.1__38898564	11	38398564	39398564	CCDC85A;
NC_030822.1__77148736	15	76648736	77648736	MMP3;MMP12;MMP13;DCUN1D5;DYNC2H1;
NC_030819.1__83458121	12	82958121	83958121	DIAPH3;
NC_030810.1__101388202	3	100888202	101888202	;TUFT1;;SNX27;;CELF3;RIIAD1;MRPL9;OAZ3;;TDRKH;LINGO4;RORC;C2CD4D;THEM5;THEM4;U1;;U1;U1;U6;;U1;;S100A10;S100A11;7SK
NC_030814.1__69559387	7	69059387	70059387	;;;OR2W3;TRIM58;;;OR6F1;OR13G1;5S_rRNA;;;OR2G3;;GCSAML;;;;OR2B11;NLRP3;ZNF496;
NC_030817.1__81625501	10	81125501	82125501	REC114;;HCN4;;NEO1;ADPGK;BBS4;ARIH1;HEXA
NC_030810.1__82825279	3	82325279	83325279	NA
NC_030819.1__5920923	12	5420923	6420923	U6;
NC_030826.1__28590607	19	28090607	29090607	PIK3R5;NTN1;;STX8;CFAP52;USP43;DHRS7C;GLP2R;RCVRN;GAS7;5S_rRNA;
NC_030814.1__69312009	7	68812009	69812009	;;;;;;OR2W3;TRIM58;;;OR6F1;OR13G1;5S_rRNA;;;OR2G3;;GCSAML;;;
NC_030818.1__34703850	11	34203850	35203850
NC_030819.1__70750174	12	70250174	71250174	LCP1;CPB2;ZC3H13;SIAH3;CBY2;;COG3;;;;SNORA31;;GTF2F2;KCTD4
NC_030831.1__12689758	24	12189758	13189758	;SERPINB8;;5S_rRNA;SYT4
NC_030831.1__12640754	24	12140754	13140754	;SERPINB8;;5S_rRNA;SYT4
NC_030836.1__1082953	29	582953	1582953	TAF1D;;;SNORD5;SNORA8;;;;SNORA25;CEP295;;;;;SMCO4;DEUP1;SLC36A4;MTNR1B;
NC_030820.1__13648254	13	13148254	14148254	;U6
NC_030830.1__15913927	23	15413927	16413927	PXDC1;;;PRPF4B;;;ECI2;;CDYL;RPP40;;PPP1R3G;LYRM4;FARS2
NC_030835.1__24450333	28	23950333	24950333	NA
NC_030818.1__34747867	11	34247867	35247867
NC_030836.1__1146923	29	646923	1646923	;;SMCO4;DEUP1;SLC36A4;MTNR1B;
NC_030818.1__34741864	11	34241864	35241864
NC_030814.1__69292585	7	68792585	69792585	;;;;;;OR2W3;TRIM58;;;OR6F1;OR13G1;5S_rRNA;;;OR2G3;;GCSAML;;;
NC_030831.1__12648594	24	12148594	13148594	;SERPINB8;;5S_rRNA;SYT4
NC_030830.1__15913732	23	15413732	16413732	PXDC1;;;PRPF4B;;;ECI2;;CDYL;RPP40;;PPP1R3G;LYRM4;FARS2
NC_030831.1__12686931	24	12186931	13186931	;SERPINB8;;5S_rRNA;SYT4
NC_030818.1__34676100	11	34176100	35176100
NC_030831.1__12687769	24	12187769	13187769	;SERPINB8;;5S_rRNA;SYT4
NC_030817.1__26102739	10	25602739	26602739	MAX;FNTB;RAB15;GPX2;CHURC1;5S_rRNA;SPTB;PLEKHG3;;PPP1R36;HSPA2;;ZBTB1;;AKAP5;MTHFD1;
NC_030831.1__12688892	24	12188892	13188892	;SERPINB8;;5S_rRNA;SYT4
NC_030831.1__12647831	24	12147831	13147831	;SERPINB8;;5S_rRNA;SYT4
NC_030821.1__39148627	14	38648627	39648627	TPD52;MRPS28;HEY1;STMN2;
NC_030814.1__69294033	7	68794033	69794033	;;;;;;OR2W3;TRIM58;;;OR6F1;OR13G1;5S_rRNA;;;OR2G3;;GCSAML;;;
NC_030833.1__4926797	26	4426797	5426797	;;PTPRE;;CLRN3;FOXI2;;;NPS;DOCK1;INSYN2A
NC_030819.1__83506654	12	83006654	84006654	DIAPH3;
NC_030816.1__9582290	9	9082290	10082290	;;IBTK;TPBG;;U2;UBE3D
NC_030819.1__5245276	12	4745276	5745276	NA;NA
NC_030836.1__1169130	29	669130	1669130	;SMCO4;DEUP1;SLC36A4;MTNR1B;
NC_030813.1__95613308	6	95113308	96113308	ANTXR2;PRDM8;FGF5;;;;
NC_030819.1__83461460	12	82961460	83961460	DIAPH3;
NC_030819.1__83461461	12	82961461	83961461	DIAPH3;
NC_030812.1__58049252	5	57549252	58549252	;;;OR6C76;OR6C75;;;;;;;;;OR6C74;;;;;;;;;
NC_030809.1__118947442	2	118447442	119447442	;SESTD1;ZNF385B;;U8;CWC22
NC_030819.1__83506826	12	83006826	84006826	DIAPH3;
NC_030809.1__55040011	2	54540011	55540011	TMEFF2;U6;CAVIN2
NC_030836.1__1148549	29	648549	1648549	;;SMCO4;DEUP1;SLC36A4;MTNR1B;
NC_030817.1__25988403	10	25488403	26488403	FUT8;MAX;FNTB;RAB15;GPX2;CHURC1;5S_rRNA;SPTB;PLEKHG3;;PPP1R36;HSPA2;;ZBTB1;
NC_030819.1__83454869	12	82954869	83954869	DIAPH3;
NC_030822.1__77181340	15	76681340	77681340	MMP12;MMP13;DCUN1D5;DYNC2H1;
NC_030831.1__12642605	24	12142605	13142605	;SERPINB8;;5S_rRNA;SYT4
NC_030819.1__83461715	12	82961715	83961715	DIAPH3;
NC_030836.1__1149289	29	649289	1649289	;;SMCO4;DEUP1;SLC36A4;MTNR1B;
NC_030818.1__89239285	11	88739285	89739285	;Metazoa_SRP;RNF144A;RSAD2;CMPK2
NC_030819.1__83459349	12	82959349	83959349	DIAPH3;
NC_030820.1__13646262	13	13146262	14146262	;U6
NC_030834.1__22535635	27	22035635	23035635	DLC1;C8orf48;5S_rRNA;SGCZ;5S_rRNA
NC_030831.1__12649555	24	12149555	13149555	;SERPINB8;;5S_rRNA;SYT4
NC_030817.1__10841813	10	10341813	11341813	STON2;;GTF2A1;SNORA79;TSHR;CEP128
NC_030810.1__102261195	3	101761195	102761195	S100A10;S100A11;7SK;TCHHL1;;;;;;CRNN;;LCE3B;KPLCE;KPRP;;;
NC_030836.1__1143473	29	643473	1643473	;;SMCO4;DEUP1;SLC36A4;MTNR1B;
NC_030818.1__88745863	11	88245863	89245863	NA;NA;NA
NC_030831.1__12685476	24	12185476	13185476	;SERPINB8;;5S_rRNA;SYT4
NC_030811.1__114089466	4	113589466	114589466	;ZPBP;VWC2
NC_030819.1__83477741	12	82977741	83977741	DIAPH3;
NC_030823.1__26258090	16	25758090	26758090	;DEGS1;NVL;U6;CNIH4;WDR26;;CNIH3;DNAH14
NC_030829.1__29795984	22	29295984	30295984	;5S_rRNA;PROK2;GPR27;EIF4E3;;;FOXP1
NC_030819.1__83460822	12	82960822	83960822	DIAPH3;
NC_030812.1__103462488	5	102962488	103962488	PLEKHG6;CD9;;VWF;ANO2;NTF3;;
NC_030819.1__83502471	12	83002471	84002471	DIAPH3;
NC_030818.1__38886226	11	38386226	39386226	CCDC85A;
NC_030830.1__1675976	23	1175976	2175976	GMDS;MYLK4;WRNIP1;SERPINB1;U1;SERPINB9;;;LY86;;
NC_030819.1__83460518	12	82960518	83960518	DIAPH3;
NC_030836.1__1315026	29	815026	1815026	SMCO4;DEUP1;SLC36A4;MTNR1B;
NC_030813.1__81277172	6	80777172	81777172	;EPHA5
NC_030819.1__83462595	12	82962595	83962595	DIAPH3;
NC_030836.1__662061	29	162061	1162061	PANX1;HEPHL1;VSTM5;MED17;C11orf54;TAF1D;;;SNORD5;SNORA8;;;;SNORA25;CEP295;;;;;SMCO4;DEUP1
NC_030819.1__83460805	12	82960805	83960805	DIAPH3;
NC_030814.1__16756829	7	16256829	17256829	MCTP1;SLF1;KIAA0825;FAM172A
NC_030809.1__120190251	2	119690251	120690251	U4;UBE2E3
NC_030818.1__34720556	11	34220556	35220556
NC_030831.1__12636947	24	12136947	13136947	;SERPINB8;;5S_rRNA;SYT4
NC_030814.1__31498709	7	30998709	31998709	NA;NA
NC_030822.1__77165027	15	76665027	77665027	MMP12;MMP13;DCUN1D5;DYNC2H1;
NC_030809.1__87838852	2	87338852	88338852	U6;;ACVR2A;ORC4;U2
NC_030819.1__83502488	12	83002488	84002488	DIAPH3;
NC_030814.1__100575072	7	100075072	101075072	;;;;;;;;SLC1A6;TEKTL1;CASP14;SYDE1;ILVBL;;NOTCH3;EPHX3;;AKAP8;AKAP8L;WIZ;RASAL3;PGLYRP2;CYP4F22

## Sheet: BL
rs	chr	down_ps	up_ps	candidate.genes
NC_030818.1__89248159	11	88748159	89748159	;Metazoa_SRP;RNF144A;RSAD2;CMPK2
NC_030809.1__94330278	2	93830278	94830278	;GALNT13;;;KCNJ3
NC_030829.1__41839689	22	41339689	42339689	;;;5S_rRNA;CFAP20DC
NC_030836.1__1082953	29	582953	1582953	TAF1D;;;SNORD5;SNORA8;;;;SNORA25;CEP295;;;;;SMCO4;DEUP1;SLC36A4;MTNR1B;
NC_030829.1__41136466	22	40636466	41636466	NA;NA
NC_030815.1__9771749	8	9271749	10271749	KIF13B;HMBOX1;;INTS9;EXTL3;FZD3;;U6;ZNF395;PNOC
NC_030817.1__91405617	10	90905617	91905617	JMY;BHMT;BHMT2;DMGDH;ARSB;;LHFPL2;SCAMP1;;AP3B1
NC_030818.1__34703850	11	34203850	35203850
NC_030828.1__38044093	21	37544093	38544093
NC_030818.1__89248733	11	88748733	89748733	;Metazoa_SRP;RNF144A;RSAD2;CMPK2
NC_030821.1__53063008	14	52563008	53563008	;CYP7B1;BHLHE22;;
NC_030828.1__38024130	21	37524130	38524130
NC_030818.1__89229413	11	88729413	89729413	;Metazoa_SRP;RNF144A;RSAD2;CMPK2
NC_030817.1__81625501	10	81125501	82125501	REC114;;HCN4;;NEO1;ADPGK;BBS4;ARIH1;HEXA
NC_030829.1__41136486	22	40636486	41636486	NA;NA
NC_030809.1__94330254	2	93830254	94830254	;GALNT13;;;KCNJ3
NC_030810.1__45487178	3	44987178	45987178	LRRC7;LRRC40;SRSF11;ANKRD13C
NC_030818.1__89250659	11	88750659	89750659	;Metazoa_SRP;RNF144A;RSAD2;CMPK2
NC_030836.1__1142360	29	642360	1642360	;;SMCO4;DEUP1;SLC36A4;MTNR1B;
NC_030836.1__1142385	29	642385	1642385	;;SMCO4;DEUP1;SLC36A4;MTNR1B;

## Sheet: CD
rs	chr	down_ps	up_ps	candidate.genes
NC_030830.1__22753062	23	22253062	23253062	NCR3;AIF1;PRRC2A;SNORA38;BAG6;APOM;GPANK1;CSNK2B;LY6G5B;LY6G5C;ABHD16A;LY6G6F;;LY6G6D;LY6G6C;MPIG6B;DDAH2;CLIC1;MSH5;SAPCD1;VWA7;VARS1;LSM2;HSPA1L;HSP70.1;;;NEU1;SLC44A4;EHMT2;ZBTB12;C2;CFB;NELFE;SKIC2;DXO;STK19;;;;CYP21A1;;;;ATF6B;FKBPL;PRRT1;PPT2;EGFL8;AGPAT1;RNF5;AGER;PBX2;GPSM3;;NOTCH4;;;;;;;;;;
NC_030818.1__89248159	11	88748159	89748159	;Metazoa_SRP;RNF144A;RSAD2;CMPK2
NC_030835.1__24450333	28	23950333	24950333	NA
NC_030818.1__89248733	11	88748733	89748733	;Metazoa_SRP;RNF144A;RSAD2;CMPK2
NC_030817.1__26009053	10	25509053	26509053	FUT8;MAX;FNTB;RAB15;GPX2;CHURC1;5S_rRNA;SPTB;PLEKHG3;;PPP1R36;HSPA2;;ZBTB1;;AKAP5;MTHFD1
NC_030817.1__26012238	10	25512238	26512238	FUT8;MAX;FNTB;RAB15;GPX2;CHURC1;5S_rRNA;SPTB;PLEKHG3;;PPP1R36;HSPA2;;ZBTB1;;AKAP5;MTHFD1
NC_030826.1__15093048	19	14593048	15593048	NLE1;FNDC8;;RFFL;LIG3;ZNF830;CCT6B;SNORA70;TMEM132E;;;CCL8;CCL11;CCL2
NC_030817.1__25988403	10	25488403	26488403	FUT8;MAX;FNTB;RAB15;GPX2;CHURC1;5S_rRNA;SPTB;PLEKHG3;;PPP1R36;HSPA2;;ZBTB1;
NC_030834.1__31597049	27	31097049	32097049	TRAPPC11;RWDD4;;ING2;CDKN2AIP;;;WWC2;DCTD;TENM3
NC_030811.1__67644275	4	67144275	68144275	;U6;;TFEC;TES
NC_030827.1__5854380	20	5354380	6354380	;;;;CPEB4;C5orf47;NSG2;;Metazoa_SRP;
NC_030827.1__2339476	20	1839476	2839476	INSYN2B;FOXI1;U6;LCP2;KCNMB1;;KCNIP1;;GABRP
NC_030818.1__105797028	11	105297028	106297028	ANAPC2;;CACNA1B;RNF224;TMEM203;SLC34A3;NDOR1;NRARP;FUT7;TOR4A;EHMT1;ENTPD2;MRPL41;ENTPD8;UAP1L1;LRRC26;NOXA1;RNF208;GRIN1;;SSNA1;NSMF;DPP7;CIMIP2A;NPDC1;TMEM210;SAPCD2;TUBB4B;ABCA2;;ZMYND19;TPRN;PNPLA7;ARRDC1;CYSRT1;DPH7;;NELFB
NC_030813.1__20572598	6	20072598	21072598	PPA2;TET2;;;CXXC4
NC_030813.1__28092987	6	27592987	28592987
NC_030823.1__61768181	16	61268181	62268181	CACNA1E;;ZNF648;;TEDDM1;;;RGSL1;RNASEL
NC_030818.1__74764921	11	74264921	75264921	NCOA1;ITSN2;;FAM228B;PFN4;TP53I3;SF3B6;FKBP1B;WDCP;MFSD2B;UBXN2A;ATAD2B;KLHL29;U6
NC_030828.1__9119692	21	8619692	9619692	NA;NA;NA
NC_030809.1__98430491	2	97930491	98930491	UPP2;CCDC148;U12;PKP4;;;DAPL1;TANC1
NC_030832.1__6194113	25	5694113	6694113	;RBFOX1
NC_030815.1__4099381	8	3599381	4599381	U6;
NC_030818.1__89239285	11	88739285	89739285	;Metazoa_SRP;RNF144A;RSAD2;CMPK2
NC_030809.1__38098940	2	37598940	38598940	LANCL1;MYL1;ACADL;KANSL1L;;UNC80;MAP2;
NC_030815.1__28414719	8	27914719	28914719	;CCDC171;;;SNAPC3
NC_030820.1__494212	13	-5788	994212	;;U6;;TMX4;;
NC_030816.1__16165381	9	15665381	16665381	SMPDL3A;FABP7;PKIB;;SERINC1;HSF2;;
NC_030813.1__22745385	6	22245385	23245385	CISD2;;MANBA;NFKB1;SLC39A8;BANK1;U6
NC_030813.1__105612200	6	105112200	106112200	ZBTB49;LYAR;TMEM128;OTOP1;DRD5;U6;SLC2A9;WDR1;ZNF518B;;
NC_030817.1__26102739	10	25602739	26602739	MAX;FNTB;RAB15;GPX2;CHURC1;5S_rRNA;SPTB;PLEKHG3;;PPP1R36;HSPA2;;ZBTB1;;AKAP5;MTHFD1;
NC_030817.1__26072624	10	25572624	26572624	FUT8;MAX;FNTB;RAB15;GPX2;CHURC1;5S_rRNA;SPTB;PLEKHG3;;PPP1R36;HSPA2;;ZBTB1;;AKAP5;MTHFD1
NC_030808.1__87898459	1	87398459	88398459	MFN1;ZNF639;KCNMB3;PIK3CA;;ZMAT3;KCNMB2
NC_030818.1__26299986	11	25799986	26799986	PLEKHH2;DYNC2LI1;ABCG5;ABCG8;;;PPM1B;SLC3A1;;PREPL;;CAMKMT
NC_030810.1__43854632	3	43354632	44354632	;WLS;;RPE65;DEPDC1
NC_030815.1__28410856	8	27910856	28910856	;CCDC171;;;SNAPC3
NC_030817.1__26071711	10	25571711	26571711	FUT8;MAX;FNTB;RAB15;GPX2;CHURC1;5S_rRNA;SPTB;PLEKHG3;;PPP1R36;HSPA2;;ZBTB1;;AKAP5;MTHFD1
NC_030832.1__2726753	25	2226753	3226753	;KREMEN2;PAQR4;PKMYT1;;CLDN9;CLDN6;TNFRSF12A;HCFC1R1;THOC6;BICDL2;MMP25;;ZSCAN10;ZNF205;ZNF213;;;;U5;OR1F1;;U6;U6;;U6;;;TIGD7;;;;;OR2C1;ZNF174;NAA60;C16orf90;CLUAP1;NLRC3;SLX4;;DNASE1;TRAP1;CREBBP;ADCY9
NC_030821.1__72476416	14	71976416	72976416	ADCY8;;;EFR3A;OC90;HHLA1;KCNQ3
NC_030809.1__98512115	2	98012115	99012115	CCDC148;U12;PKP4;;;DAPL1;TANC1
NC_030817.1__26061262	10	25561262	26561262	FUT8;MAX;FNTB;RAB15;GPX2;CHURC1;5S_rRNA;SPTB;PLEKHG3;;PPP1R36;HSPA2;;ZBTB1;;AKAP5;MTHFD1
NC_030821.1__61964980	14	61464980	62464980	SNTG1;;PPDPFL;SNAI2;CLXN;UBE2V2
NC_030821.1__72478761	14	71978761	72978761	ADCY8;;;EFR3A;OC90;HHLA1;KCNQ3
NC_030818.1__105800959	11	105300959	106300959	ANAPC2;CACNA1B;RNF224;TMEM203;SLC34A3;NDOR1;NRARP;FUT7;TOR4A;EHMT1;ENTPD2;MRPL41;ENTPD8;UAP1L1;LRRC26;NOXA1;RNF208;GRIN1;;SSNA1;NSMF;DPP7;CIMIP2A;NPDC1;TMEM210;SAPCD2;TUBB4B;ABCA2;;ZMYND19;TPRN;PNPLA7;ARRDC1;CYSRT1;DPH7;;NELFB
NC_030819.1__57120159	12	56620159	57620159	;MEDAG;TEX26;;;HSPH1;B3GLCT;RXFP2;
NC_030818.1__34747867	11	34247867	35247867
NC_030813.1__28088136	6	27588136	28588136
NC_030821.1__72478141	14	71978141	72978141	ADCY8;;;EFR3A;OC90;HHLA1;KCNQ3
NC_030820.1__495198	13	-4802	995198	;;U6;;TMX4;;
NC_030818.1__20010426	11	19510426	20510426	CEBPZ;NDUFAF7;PRKD3;QPCT;CDC42EP3;RMDN2;CYP1B1
NC_030832.1__20326265	25	19826265	20826265	EEF2K;POLR3E;;;METTL9;IGSF6;;;;;HS3ST2;;USP31;;SCNN1G
NC_030814.1__14405150	7	13905150	14905150	RIOK2;LIX1;;LNPEP;ERAP2;ERAP1;CAST;;;PCSK1;
NC_030811.1__67654358	4	67154358	68154358	;U6;;TFEC;TES
NC_030829.1__12514018	22	12014018	13014018	SCN10A;SCN11A;;WDR48;GORASP1;TTC21A;CSRNP1;XIRP1;CX3CR1;CCR8;SLC25A38;;RPSA;SNORA62;SNORA62;MOBP;MYRIP

## Sheet: CW
rs	chr	down_ps	up_ps	candidate.genes
NC_030815.1__61289336	8	60789336	61789336	PAX5;ZCCHC7;GRHPR;ZBTB5;U6;POLR1E;FBXO10;TOMM5;FRMPD1;TRMT10B;EXOSC3;DCAF10;;SHB
NC_030817.1__7159951	10	6659951	7659951	;;Y_RNA
NC_030823.1__5837429	16	5337429	6337429	;KCNT2;ATP2B4;;;;;;
NC_030836.1__110154	29	-389846	610154	PANX1;HEPHL1;VSTM5;MED17;C11orf54;TAF1D;;;SNORD5;SNORA8;;;;SNORA25;CEP295;;
NC_030815.1__61270585	8	60770585	61770585	PAX5;ZCCHC7;GRHPR;ZBTB5;U6;POLR1E;FBXO10;TOMM5;FRMPD1;TRMT10B;EXOSC3;DCAF10;;SHB
NC_030812.1__74802172	5	74302172	75302172	SSTR3;RAC2;CYTH4;ELFN2;;CARD10;U6;USP18;;SYT10;
NC_030836.1__110145	29	-389855	610145	PANX1;HEPHL1;VSTM5;MED17;C11orf54;TAF1D;;;SNORD5;SNORA8;;;;SNORA25;CEP295;;
NC_030809.1__24417638	2	23917638	24917638	SCG2;;;;KCNE4;;ACSL3
NC_030816.1__13441475	9	12941475	13941475	;;HDDC2;TPD52L1;RNF217;;;
NC_030820.1__54679761	13	54179761	55179761	CABLES2;RPS21;LAMA5;ADRM1;OSBPL2;HRH3;MTG2;SS18L1;PSMA7;;TAF4;CDH4;
NC_030820.1__54681760	13	54181760	55181760	CABLES2;RPS21;LAMA5;ADRM1;OSBPL2;HRH3;MTG2;SS18L1;PSMA7;;TAF4;CDH4;
NC_030817.1__26072624	10	25572624	26572624	FUT8;MAX;FNTB;RAB15;GPX2;CHURC1;5S_rRNA;SPTB;PLEKHG3;;PPP1R36;HSPA2;;ZBTB1;;AKAP5;MTHFD1
NC_030812.1__58051342	5	57551342	58551342	;;;OR6C76;OR6C75;;;;;;;;;OR6C74;;;;;;;;;
NC_030820.1__41200051	13	40700051	41700051	FOXA2;;;U6;THBD;CD93;;;GZF1;NAPB;;;;;;;;CST3;;

## Sheet: CG
rs	chr	down_ps	up_ps	candidate.genes
NC_030818.1__89248159	11	88748159	89748159	;Metazoa_SRP;RNF144A;RSAD2;CMPK2
NC_030818.1__89248733	11	88748733	89748733	;Metazoa_SRP;RNF144A;RSAD2;CMPK2
NC_030833.1__4926797	26	4426797	5426797	;;PTPRE;;CLRN3;FOXI2;;;NPS;DOCK1;INSYN2A
NC_030836.1__1082953	29	582953	1582953	TAF1D;;;SNORD5;SNORA8;;;;SNORA25;CEP295;;;;;SMCO4;DEUP1;SLC36A4;MTNR1B;
NC_030836.1__1149289	29	649289	1649289	;;SMCO4;DEUP1;SLC36A4;MTNR1B;
NC_030836.1__1146923	29	646923	1646923	;;SMCO4;DEUP1;SLC36A4;MTNR1B;
NC_030836.1__1169130	29	669130	1669130	;SMCO4;DEUP1;SLC36A4;MTNR1B;
NC_030819.1__14854445	12	14354445	15354445	NA;NA;NA;NA;NA;NA;NA;NA
NC_030817.1__26102739	10	25602739	26602739	MAX;FNTB;RAB15;GPX2;CHURC1;5S_rRNA;SPTB;PLEKHG3;;PPP1R36;HSPA2;;ZBTB1;;AKAP5;MTHFD1;
NC_030836.1__1115115	29	615115	1615115	CEP295;;;SMCO4;DEUP1;SLC36A4;MTNR1B;
NC_030818.1__88216493	11	87716493	88716493	ASAP2;;MBOAT2;KIDINS220;;;
NC_030818.1__34747867	11	34247867	35247867
NC_030836.1__38380870	29	37880870	38880870	;;;;;PAG-3;;PAG-6;;PAG-5;
NC_030821.1__72394397	14	71894397	72894397	ADCY8;;;EFR3A;OC90
NC_030817.1__26072624	10	25572624	26572624	FUT8;MAX;FNTB;RAB15;GPX2;CHURC1;5S_rRNA;SPTB;PLEKHG3;;PPP1R36;HSPA2;;ZBTB1;;AKAP5;MTHFD1
NC_030816.1__56144578	9	55644578	56644578	;TMEM200A;EPB41L2;5S_rRNA;AKAP7;;
NC_030816.1__56144596	9	55644596	56644596	;TMEM200A;EPB41L2;5S_rRNA;AKAP7;;
NC_030815.1__3926646	8	3426646	4426646	U6
NC_030816.1__13441475	9	12941475	13941475	;;HDDC2;TPD52L1;RNF217;;;
NC_030819.1__70750174	12	70250174	71250174	LCP1;CPB2;ZC3H13;SIAH3;CBY2;;COG3;;;;SNORA31;;GTF2F2;KCTD4
NC_030830.1__1646959	23	1146959	2146959	GMDS;MYLK4;WRNIP1;SERPINB1;U1;SERPINB9;;;LY86;;
NC_030822.1__78702545	15	78202545	79202545	NA
NC_030830.1__15913732	23	15413732	16413732	PXDC1;;;PRPF4B;;;ECI2;;CDYL;RPP40;;PPP1R3G;LYRM4;FARS2
NC_030836.1__1148365	29	648365	1648365	;;SMCO4;DEUP1;SLC36A4;MTNR1B;
NC_030817.1__26009053	10	25509053	26509053	FUT8;MAX;FNTB;RAB15;GPX2;CHURC1;5S_rRNA;SPTB;PLEKHG3;;PPP1R36;HSPA2;;ZBTB1;;AKAP5;MTHFD1
NC_030828.1__57455458	21	56955458	57955458	GOLGA5;CHGA;ITPK1;U6;LYSET;UBR7;BTBD7;UNC79;;PRIMA1
NC_030817.1__26012238	10	25512238	26512238	FUT8;MAX;FNTB;RAB15;GPX2;CHURC1;5S_rRNA;SPTB;PLEKHG3;;PPP1R36;HSPA2;;ZBTB1;;AKAP5;MTHFD1
NC_030814.1__69288917	7	68788917	69788917	;;;;;;OR2W3;TRIM58;;;OR6F1;OR13G1;5S_rRNA;;;OR2G3;;GCSAML;;;
NC_030813.1__28063528	6	27563528	28563528
NC_030836.1__1143519	29	643519	1643519	;;SMCO4;DEUP1;SLC36A4;MTNR1B;
NC_030818.1__88229303	11	87729303	88729303	ASAP2;;MBOAT2;KIDINS220;;;
NC_030817.1__26061262	10	25561262	26561262	FUT8;MAX;FNTB;RAB15;GPX2;CHURC1;5S_rRNA;SPTB;PLEKHG3;;PPP1R36;HSPA2;;ZBTB1;;AKAP5;MTHFD1
NC_030808.1__115734247	1	115234247	116234247	;U2;SUCNR1;;;;AADACL2;
NC_030815.1__3961703	8	3461703	4461703	U6
NC_030836.1__1142360	29	642360	1642360	;;SMCO4;DEUP1;SLC36A4;MTNR1B;
NC_030836.1__1142385	29	642385	1642385	;;SMCO4;DEUP1;SLC36A4;MTNR1B;
NC_030818.1__89248911	11	88748911	89748911	;Metazoa_SRP;RNF144A;RSAD2;CMPK2
NC_030821.1__39148627	14	38648627	39648627	TPD52;MRPS28;HEY1;STMN2;
NC_030828.1__57309747	21	56809747	57809747	RIN3;LGMN;GOLGA5;CHGA;ITPK1;U6;LYSET;UBR7;BTBD7;UNC79;;PRIMA1
NC_030831.1__26665449	24	26165449	27165449	DSC1;DSC2;DSC3;
NC_030813.1__28061433	6	27561433	28561433
NC_030834.1__34254319	27	33754319	34754319	;U6;;
NC_030818.1__89214761	11	88714761	89714761	;Metazoa_SRP;RNF144A;RSAD2;CMPK2
NC_030818.1__89250659	11	88750659	89750659	;Metazoa_SRP;RNF144A;RSAD2;CMPK2
NC_030818.1__74764921	11	74264921	75264921	NCOA1;ITSN2;;FAM228B;PFN4;TP53I3;SF3B6;FKBP1B;WDCP;MFSD2B;UBXN2A;ATAD2B;KLHL29;U6
NC_030818.1__89242536	11	88742536	89742536	;Metazoa_SRP;RNF144A;RSAD2;CMPK2
NC_030821.1__72401683	14	71901683	72901683	ADCY8;;;EFR3A;OC90
NC_030817.1__25992386	10	25492386	26492386	FUT8;MAX;FNTB;RAB15;GPX2;CHURC1;5S_rRNA;SPTB;PLEKHG3;;PPP1R36;HSPA2;;ZBTB1;
NC_030818.1__34741864	11	34241864	35241864
NC_030811.1__8278839	4	7778839	8778839	;;;REPIN1;RARRES2;LRRC61;ATP6V0E2;ZNF862;;ZNF467;ZNF746;ZNF777;;ZNF212;5S_rRNA;ZNF282;ZNF398;;ZNF786;PDIA4;Y_RNA;Y_RNA;Y_RNA;Y_RNA;EZH2;
NC_030825.1__31161980	18	30661980	31661980	CDH8;;
NC_030821.1__72365151	14	71865151	72865151	ADCY8;;;EFR3A
NC_030820.1__20804346	13	20304346	21304346	MALRD1;U6;PLXDC2;7SK
NC_030817.1__25988403	10	25488403	26488403	FUT8;MAX;FNTB;RAB15;GPX2;CHURC1;5S_rRNA;SPTB;PLEKHG3;;PPP1R36;HSPA2;;ZBTB1;
NC_030825.1__22680339	18	22180339	23180339	MYLK3;ORC6;VPS35;SHCBP1;;;CHD9;RBL2
NC_030812.1__46316813	5	45816813	46816813	CAND1;;GRIP1;U1
NC_030813.1__28062411	6	27562411	28562411
NC_030828.1__57357520	21	56857520	57857520	LGMN;GOLGA5;CHGA;ITPK1;U6;LYSET;UBR7;BTBD7;UNC79;;PRIMA1
NC_030812.1__74802172	5	74302172	75302172	SSTR3;RAC2;CYTH4;ELFN2;;CARD10;U6;USP18;;SYT10;
NC_030818.1__89247063	11	88747063	89747063	;Metazoa_SRP;RNF144A;RSAD2;CMPK2
NC_030831.1__37824965	24	37324965	38324965	SMCHD1;EMILIN2;;U6;LPIN2;MYOM1;MYL12A;MYL12B;TGIF1;DLGAP1;SNORA70
NC_030836.1__653052	29	153052	1153052	PANX1;HEPHL1;VSTM5;MED17;C11orf54;TAF1D;;;SNORD5;SNORA8;;;;SNORA25;CEP295;;;;;SMCO4;DEUP1

## Sheet: RW
rs	chr	down_ps	up_ps	candidate.genes
NC_030811.1__35621895	4	35121895	36121895	;KCND2;
NC_030817.1__26072624	10	25572624	26572624	FUT8;MAX;FNTB;RAB15;GPX2;CHURC1;5S_rRNA;SPTB;PLEKHG3;;PPP1R36;HSPA2;;ZBTB1;;AKAP5;MTHFD1
NC_030811.1__67718395	4	67218395	68218395	;U6;;TFEC;TES
NC_030818.1__89248159	11	88748159	89748159	;Metazoa_SRP;RNF144A;RSAD2;CMPK2
NC_030811.1__35624285	4	35124285	36124285	;KCND2;
NC_030808.1__93014590	1	92514590	93514590	NLGN1;
NC_030835.1__8932303	28	8432303	9432303	NA;NA
NC_030834.1__6275148	27	5775148	6775148	;;LRRC3B;;PSD3
NC_030818.1__27354146	11	26854146	27854146	;;;;;;;SIX3;;SIX2;;;SRBD1;;
NC_030817.1__26102739	10	25602739	26602739	MAX;FNTB;RAB15;GPX2;CHURC1;5S_rRNA;SPTB;PLEKHG3;;PPP1R36;HSPA2;;ZBTB1;;AKAP5;MTHFD1;
NC_030809.1__93260916	2	92760916	93760916	;RPRM
NC_030817.1__26037595	10	25537595	26537595	FUT8;MAX;FNTB;RAB15;GPX2;CHURC1;5S_rRNA;SPTB;PLEKHG3;;PPP1R36;HSPA2;;ZBTB1;;AKAP5;MTHFD1
NC_030820.1__54550748	13	54050748	55050748	MIR1;;;GATA5;RBBP8NL;CABLES2;RPS21;LAMA5;ADRM1;OSBPL2;HRH3;MTG2;SS18L1;PSMA7;;TAF4;CDH4
NC_030811.1__35621550	4	35121550	36121550	;KCND2;
NC_030808.1__115734247	1	115234247	116234247	;U2;SUCNR1;;;;AADACL2;
NC_030811.1__35622389	4	35122389	36122389	;KCND2;
NC_030813.1__28063528	6	27563528	28563528
NC_030831.1__37824965	24	37324965	38324965	SMCHD1;EMILIN2;;U6;LPIN2;MYOM1;MYL12A;MYL12B;TGIF1;DLGAP1;SNORA70
NC_030818.1__81977898	11	81477898	82477898	CYRIA;;;MYCN;;;DDX1;NBAS
NC_030818.1__89248733	11	88748733	89748733	;Metazoa_SRP;RNF144A;RSAD2;CMPK2
NC_030820.1__20560824	13	20060824	21060824	MALRD1;U6;PLXDC2;7SK
NC_030817.1__26009053	10	25509053	26509053	FUT8;MAX;FNTB;RAB15;GPX2;CHURC1;5S_rRNA;SPTB;PLEKHG3;;PPP1R36;HSPA2;;ZBTB1;;AKAP5;MTHFD1
NC_030818.1__34739875	11	34239875	35239875
NC_030817.1__3080422	10	2580422	3580422	TTC8;EML5;;PTPN21;;KCNK10;GPR65;GALC
NC_030817.1__26061262	10	25561262	26561262	FUT8;MAX;FNTB;RAB15;GPX2;CHURC1;5S_rRNA;SPTB;PLEKHG3;;PPP1R36;HSPA2;;ZBTB1;;AKAP5;MTHFD1
NC_030818.1__89218128	11	88718128	89718128	;Metazoa_SRP;RNF144A;RSAD2;CMPK2
NC_030827.1__9092926	20	8592926	9592926	FCHO2;TNPO1;;ZNF366;PTCD2;MRPS27;MAP1B;
NC_030816.1__80510548	9	80010548	81010548	;;5S_rRNA
NC_030828.1__51778706	21	51278706	52278706	NA
NC_030817.1__26012238	10	25512238	26512238	FUT8;MAX;FNTB;RAB15;GPX2;CHURC1;5S_rRNA;SPTB;PLEKHG3;;PPP1R36;HSPA2;;ZBTB1;;AKAP5;MTHFD1
NC_030811.1__35622440	4	35122440	36122440	;KCND2;
NC_030811.1__67644275	4	67144275	68144275	;U6;;TFEC;TES
NC_030811.1__7080447	4	6580447	7580447	NA;NA;NA;NA;NA;NA;NA;NA;NA;NA;NA;NA;NA;NA;NA;NA;NA;NA;NA;NA;NA;NA;NA;NA;NA;NA
NC_030811.1__35624860	4	35124860	36124860	;KCND2;
NC_030811.1__35623089	4	35123089	36123089	;KCND2;
NC_030811.1__67714352	4	67214352	68214352	;U6;;TFEC;TES
NC_030818.1__74763293	11	74263293	75263293	NCOA1;ITSN2;;FAM228B;PFN4;TP53I3;SF3B6;FKBP1B;WDCP;MFSD2B;UBXN2A;ATAD2B;KLHL29;U6
NC_030811.1__67722739	4	67222739	68222739	;U6;;TFEC;TES
NC_030813.1__4553700	6	4053700	5053700	U6;QRFPR;;TNIP3;U6;NDNF;PRDM5;U6
NC_030818.1__34703850	11	34203850	35203850
NC_030825.1__31161980	18	30661980	31661980	CDH8;;
NC_030834.1__6276415	27	5776415	6776415	;;LRRC3B;;PSD3
NC_030823.1__59167915	16	58667915	59667915	RALGPS2;ANGPTL1;FAM20B;TOR3A;ABL2;SOAT1;AXDND1;;NPHS2;TDRD5;U6;;FAM163A;TOR1AIP2
NC_030820.1__54640722	13	54140722	55140722	RBBP8NL;CABLES2;RPS21;LAMA5;ADRM1;OSBPL2;HRH3;MTG2;SS18L1;PSMA7;;TAF4;CDH4;
NC_030836.1__1115115	29	615115	1615115	CEP295;;;SMCO4;DEUP1;SLC36A4;MTNR1B;
NC_030836.1__1082953	29	582953	1582953	TAF1D;;;SNORD5;SNORA8;;;;SNORA25;CEP295;;;;;SMCO4;DEUP1;SLC36A4;MTNR1B;
NC_030823.1__17597811	16	17097811	18097811	KCTD3;;;
NC_030822.1__78702545	15	78202545	79202545	NA
NC_030821.1__73023473	14	72523473	73523473	EFR3A;OC90;HHLA1;KCNQ3;;;DNAAF11;TMEM71;PHF20L1
NC_030808.1__115730954	1	115230954	116230954	;U2;SUCNR1;;;;AADACL2;
NC_030820.1__56582366	13	56082366	57082366	PHACTR3;;EDN3;ZNF831;;;TUBB1;CTSZ;;GNAS;;;;;;;;;;NPEPL1;STX16

## Sheet: RH
rs	chr	down_ps	up_ps	candidate.genes
NC_030818.1__89248733	11	88748733	89748733	;Metazoa_SRP;RNF144A;RSAD2;CMPK2
NC_030818.1__89248911	11	88748911	89748911	;Metazoa_SRP;RNF144A;RSAD2;CMPK2
NC_030818.1__89248159	11	88748159	89748159	;Metazoa_SRP;RNF144A;RSAD2;CMPK2
NC_030814.1__69288917	7	68788917	69788917	;;;;;;OR2W3;TRIM58;;;OR6F1;OR13G1;5S_rRNA;;;OR2G3;;GCSAML;;;
NC_030818.1__88216493	11	87716493	88716493	ASAP2;;MBOAT2;KIDINS220;;;
NC_030830.1__1646959	23	1146959	2146959	GMDS;MYLK4;WRNIP1;SERPINB1;U1;SERPINB9;;;LY86;;
NC_030819.1__83458121	12	82958121	83958121	DIAPH3;
NC_030819.1__83460518	12	82960518	83960518	DIAPH3;
NC_030818.1__89214761	11	88714761	89714761	;Metazoa_SRP;RNF144A;RSAD2;CMPK2
NC_030813.1__97313845	6	96813845	97813845	HNRNPD;HNRNPDL;ENOPH1;TMEM150C;U4
NC_030809.1__108921274	2	108421274	109421274	CERS6;;;NOSTRIN;SPC25;U6;G6PC2;ABCB11;DHRS9;U6;LRP2
NC_030817.1__26102739	10	25602739	26602739	MAX;FNTB;RAB15;GPX2;CHURC1;5S_rRNA;SPTB;PLEKHG3;;PPP1R36;HSPA2;;ZBTB1;;AKAP5;MTHFD1;
NC_030812.1__58034256	5	57534256	58534256	;;;;OR6C76;OR6C75;;;;;;;;;OR6C74;;;;;;;;;
NC_030820.1__13648254	13	13148254	14148254	;U6
NC_030818.1__88833042	11	88333042	89333042	;;Metazoa_SRP
NC_030817.1__25988403	10	25488403	26488403	FUT8;MAX;FNTB;RAB15;GPX2;CHURC1;5S_rRNA;SPTB;PLEKHG3;;PPP1R36;HSPA2;;ZBTB1;
NC_030816.1__16165381	9	15665381	16665381	SMPDL3A;FABP7;PKIB;;SERINC1;HSF2;;
NC_030819.1__5245276	12	4745276	5745276	NA;NA
NC_030819.1__5920923	12	5420923	6420923	U6;
NC_030819.1__83462595	12	82962595	83962595	DIAPH3;
NC_030819.1__83462610	12	82962610	83962610	DIAPH3;
NC_030820.1__13646262	13	13146262	14146262	;U6
NC_030814.1__56299884	7	55799884	56799884	NR3C1;;
NC_030831.1__27977303	24	27477303	28477303	NA;NA
NC_030819.1__83460882	12	82960882	83960882	DIAPH3;
NC_030819.1__83460885	12	82960885	83960885	DIAPH3;
NC_030814.1__69312748	7	68812748	69812748	;;;;;;OR2W3;TRIM58;;;OR6F1;OR13G1;5S_rRNA;;;OR2G3;;GCSAML;;;
NC_030819.1__83459349	12	82959349	83959349	DIAPH3;
NC_030825.1__39333076	18	38833076	39833076	ZFHX3
NC_030819.1__83460894	12	82960894	83960894	DIAPH3;
NC_030819.1__83461460	12	82961460	83961460	DIAPH3;
NC_030819.1__83461461	12	82961461	83961461	DIAPH3;
NC_030835.1__24450333	28	23950333	24950333	NA
NC_030818.1__89250659	11	88750659	89750659	;Metazoa_SRP;RNF144A;RSAD2;CMPK2
NC_030819.1__83454869	12	82954869	83954869	DIAPH3;
NC_030817.1__26072624	10	25572624	26572624	FUT8;MAX;FNTB;RAB15;GPX2;CHURC1;5S_rRNA;SPTB;PLEKHG3;;PPP1R36;HSPA2;;ZBTB1;;AKAP5;MTHFD1
NC_030826.1__28590607	19	28090607	29090607	PIK3R5;NTN1;;STX8;CFAP52;USP43;DHRS7C;GLP2R;RCVRN;GAS7;5S_rRNA;
NC_030819.1__83453073	12	82953073	83953073	DIAPH3;
NC_030818.1__89242536	11	88742536	89742536	;Metazoa_SRP;RNF144A;RSAD2;CMPK2
NC_030832.1__22409647	25	21909647	22909647	CACNG3;RBBP6;;TNRC6A;SLC5A11;ARHGAP17;LCMT1;;AQP8;ZKSCAN2
NC_030819.1__83461037	12	82961037	83961037	DIAPH3;
NC_030819.1__83461715	12	82961715	83961715	DIAPH3;
NC_030819.1__83460822	12	82960822	83960822	DIAPH3;
NC_030817.1__26061262	10	25561262	26561262	FUT8;MAX;FNTB;RAB15;GPX2;CHURC1;5S_rRNA;SPTB;PLEKHG3;;PPP1R36;HSPA2;;ZBTB1;;AKAP5;MTHFD1
NC_030817.1__26009053	10	25509053	26509053	FUT8;MAX;FNTB;RAB15;GPX2;CHURC1;5S_rRNA;SPTB;PLEKHG3;;PPP1R36;HSPA2;;ZBTB1;;AKAP5;MTHFD1
NC_030819.1__83460805	12	82960805	83960805	DIAPH3;
NC_030819.1__83461431	12	82961431	83961431	DIAPH3;
NC_030808.1__28825916	1	28325916	29325916
NC_030808.1__72248007	1	71748007	72748007	;;APOD;;ACAP2;U1;XXYLT1;;;;;FAM43A;LSG1;TMEM44
NC_030813.1__97231238	6	96731238	97731238	HNRNPD;HNRNPDL;ENOPH1
NC_030831.1__12686968	24	12186968	13186968	;SERPINB8;;5S_rRNA;SYT4
NC_030830.1__15913732	23	15413732	16413732	PXDC1;;;PRPF4B;;;ECI2;;CDYL;RPP40;;PPP1R3G;LYRM4;FARS2
NC_030816.1__9612715	9	9112715	10112715	;;IBTK;TPBG;;U2;UBE3D
NC_030819.1__58805990	12	58305990	59305990	PDS5B;KL;STARD13;;RFC3
NC_030819.1__83459303	12	82959303	83959303	DIAPH3;
NC_030825.1__31161980	18	30661980	31661980	CDH8;;
NC_030817.1__17385274	10	16885274	17885274	;PGF;RPS6KL1;DLST;PROX2;YLPM1;;AREL1;;LTBP2;ISCA2;NPC2;U2;;SYNDIG1L;VRTN;ABCD4;VSX2;LIN52;ALDH6A1;BBOF1;ENTPD5;COQ6;FAM161B;ZNF410;PTGR2
NC_030817.1__26012238	10	25512238	26512238	FUT8;MAX;FNTB;RAB15;GPX2;CHURC1;5S_rRNA;SPTB;PLEKHG3;;PPP1R36;HSPA2;;ZBTB1;;AKAP5;MTHFD1
NC_030819.1__83505104	12	83005104	84005104	DIAPH3;
NC_030830.1__10585640	23	10085640	11085640	;STMND1;RBM24;;CAP2;U6;;FAM8A1;NUP153;KIF13A;U6;NHLRC1;;TPMT;KDM1B;5S_rRNA;DEK
NC_030818.1__38468699	11	37968699	38968699	EFEMP1;;MIR216A;chi-mir-216b;CCDC85A
NC_030813.1__97308711	6	96808711	97808711	HNRNPD;HNRNPDL;ENOPH1;TMEM150C;U4
NC_030813.1__81277172	6	80777172	81777172	;EPHA5
NC_030818.1__38899525	11	38399525	39399525	CCDC85A;
NC_030810.1__85931116	3	85431116	86431116	;;;EEIG2;HENMT1;;FNDC7;STXBP3;;;GPSM2;SNORA70;RNaseP_nuc;CLCC1;WDR47;;TMEM167B;SCARNA2;CFAP276;ELAPOR1;SARS1;CELSR2;PSRC1;MYBPHL
NC_030831.1__27977519	24	27477519	28477519	NA;NA
NC_030818.1__88840223	11	88340223	89340223	;;Metazoa_SRP
NC_030834.1__7746579	27	7246579	8246579	5S_rRNA;5S_rRNA;SH2D4A;CSGALNACT1;U1;U6;;INTS10;HGSNAT;POMK;;HOOK3;;RNF170;THAP1;CHRNA6;CHRNB3;U6;SMIM19
NC_030810.1__102261195	3	101761195	102761195	S100A10;S100A11;7SK;TCHHL1;;;;;;CRNN;;LCE3B;KPLCE;KPRP;;;
NC_030813.1__97379952	6	96879952	97879952	HNRNPD;HNRNPDL;ENOPH1;TMEM150C;U4

## Sheet: CC
rs	chr	down_ps	up_ps	candidate.genes
NC_030813.1__62808546	6	62308546	63308546	GRXCR1;5S_rRNA;
NC_030814.1__45796897	7	45296897	46296897	;GRIA1;;
NC_030834.1__19260188	27	18760188	19760188	GSR;;SMIM18;;RBPMS;DCTN6;MBOAT4;LEPROTL1;SARAF;;
NC_030823.1__34377136	16	33877136	34877136	;;;;;;DPT
NC_030809.1__99115996	2	98615996	99615996	;DAPL1;TANC1;WDSUB1;;;;MARCHF7;CD302
NC_030827.1__68010713	20	67510713	68510713	ICE1;;;ADAMTS16;;U6
NC_030818.1__89248159	11	88748159	89748159	;Metazoa_SRP;RNF144A;RSAD2;CMPK2
