# Supplementary material for: Genome-Wide Association Study of Body Conformation Traits in Tashi Goats (Capra hircus)
Source: Animals (Basel). 2024 Apr 9;14(8):1145. doi: 10.3390/ani14081145 (PMC11047570; doi:10.3390/ani14081145)
Supplement: Supplementary file 1 [file animals-14-01145-s001.zip › Supplementary Table 2.xlsx]

## Sheet: Supplementary Table S2
Table S2. The 183 genes were annotated based on 279 intersecting SNPs
ensembl_gene_id	external_gene_name
ENSCHIG00000002129
ENSCHIG00000002094	SMCO4
ENSCHIG00000018338	DEUP1
ENSCHIG00000025083	SLC36A4
ENSCHIG00000019999	MTNR1B
ENSCHIG00000010579
ENSCHIG00000011029
ENSCHIG00000005744
ENSCHIG00000016635
ENSCHIG00000004292
ENSCHIG00000003607	OR6C76
ENSCHIG00000005914	OR6C75
ENSCHIG00000001653
ENSCHIG00000005984
ENSCHIG00000007816
ENSCHIG00000008039
ENSCHIG00000008116
ENSCHIG00000016606
ENSCHIG00000007872
ENSCHIG00000023020
ENSCHIG00000006373	OR6C74
ENSCHIG00000013321
ENSCHIG00000013688
ENSCHIG00000012251
ENSCHIG00000011726
ENSCHIG00000010533
ENSCHIG00000025268
ENSCHIG00000018357
ENSCHIG00000012759
ENSCHIG00000026832
ENSCHIG00000006230	5S_rRNA
ENSCHIG00000009053
ENSCHIG00000019889
ENSCHIG00000021603
ENSCHIG00000022465
ENSCHIG00000011430	CENPW
ENSCHIG00000002463
ENSCHIG00000020274	TRMT11
ENSCHIG00000025269	HINT3
ENSCHIG00000013795	NCOA7
ENSCHIG00000003739
ENSCHIG00000013218	IPO11
ENSCHIG00000003155	U6
ENSCHIG00000007700	DIMT1
ENSCHIG00000013496	KIF2A
ENSCHIG00000015632	AARS1
ENSCHIG00000007389	EXOSC6
ENSCHIG00000019584
ENSCHIG00000016561	PDPR
ENSCHIG00000009836	GLG1
ENSCHIG00000014158	RFWD3
ENSCHIG00000019391	MLKL
ENSCHIG00000012134	FA2H
ENSCHIG00000021153
ENSCHIG00000010052	WDR59
ENSCHIG00000010049	ZNRF1
ENSCHIG00000012303	LDHD
ENSCHIG00000015281	ZFP1
ENSCHIG00000003189
ENSCHIG00000003009	U6
ENSCHIG00000019649
ENSCHIG00000014007
ENSCHIG00000004404
ENSCHIG00000026368	BCAR1
ENSCHIG00000016114	BCNT
ENSCHIG00000003658	Vault
ENSCHIG00000018018	P97BCNT
ENSCHIG00000025111
ENSCHIG00000026355	TMEM170A
ENSCHIG00000010376
ENSCHIG00000001741
ENSCHIG00000013227
ENSCHIG00000006036	U6
ENSCHIG00000022122
ENSCHIG00000008791	TMX4
ENSCHIG00000001742
ENSCHIG00000001748
ENSCHIG00000023851	IL21R
ENSCHIG00000012815	GTF3C1
ENSCHIG00000014045	KATNIP
ENSCHIG00000017943	GSG1L
ENSCHIG00000022341	XPO6
ENSCHIG00000012105
ENSCHIG00000010418
ENSCHIG00000007938	SBK1
ENSCHIG00000010844
ENSCHIG00000025007	LAT
ENSCHIG00000017567	SPNS1
ENSCHIG00000018034	NFATC2IP
ENSCHIG00000023420	CD19
ENSCHIG00000023058	RABEP2
ENSCHIG00000024152	ATP2A1
ENSCHIG00000016224	IL20RA
ENSCHIG00000002783
ENSCHIG00000026489	IL22RA2
ENSCHIG00000013778	IFNGR1
ENSCHIG00000010551	OLIG3
ENSCHIG00000002788
ENSCHIG00000002791
ENSCHIG00000021461	TNFAIP3
ENSCHIG00000004447	7SK
ENSCHIG00000003465	U6
ENSCHIG00000015047	PERP
ENSCHIG00000026696	ARFGEF3
ENSCHIG00000024784
ENSCHIG00000012753	TMEM200A
ENSCHIG00000010211	EPB41L2
ENSCHIG00000005923	5S_rRNA
ENSCHIG00000020750	AKAP7
ENSCHIG00000019961
ENSCHIG00000007926
ENSCHIG00000021672
ENSCHIG00000011894
ENSCHIG00000011002
ENSCHIG00000026281	GARIN6
ENSCHIG00000020715
ENSCHIG00000024173
ENSCHIG00000023873	TPX2
ENSCHIG00000017086	MYLK2
ENSCHIG00000013849	FOXS1
ENSCHIG00000027084
ENSCHIG00000022835	DUSP15
ENSCHIG00000013487
ENSCHIG00000016443	TTLL9
ENSCHIG00000016687	PDRG1
ENSCHIG00000027052	XKR7
ENSCHIG00000019648	CCM2L
ENSCHIG00000021802	HCK
ENSCHIG00000012891	TM9SF4
ENSCHIG00000026982	PLAGL2
ENSCHIG00000021140	POFUT1
ENSCHIG00000027020	KIF3B
ENSCHIG00000025369	ASXL1
ENSCHIG00000016821
ENSCHIG00000011360
ENSCHIG00000025689	NOL4L
ENSCHIG00000015431
ENSCHIG00000025846
ENSCHIG00000019380	COMMD7
ENSCHIG00000006391	DNMT3B
ENSCHIG00000023232
ENSCHIG00000014175	EFCAB8
ENSCHIG00000021312	RALGPS2
ENSCHIG00000009736	ANGPTL1
ENSCHIG00000015949	FAM20B
ENSCHIG00000021431	TOR3A
ENSCHIG00000012642	ABL2
ENSCHIG00000021424	SOAT1
ENSCHIG00000010311	AXDND1
ENSCHIG00000001038
ENSCHIG00000003280	NPHS2
ENSCHIG00000026884	TDRD5
ENSCHIG00000005586	U6
ENSCHIG00000001041
ENSCHIG00000026083	FAM163A
ENSCHIG00000013165	TOR1AIP2
ENSCHIG00000000808
ENSCHIG00000000813
ENSCHIG00000011065
ENSCHIG00000000817
ENSCHIG00000000820
ENSCHIG00000000891	U4
ENSCHIG00000000823
ENSCHIG00000016179	TTC8
ENSCHIG00000018292	EML5
ENSCHIG00000022904
ENSCHIG00000014724	PTPN21
ENSCHIG00000022009
ENSCHIG00000016823	KCNK10
ENSCHIG00000022136	GPR65
ENSCHIG00000018791	GALC
ENSCHIG00000010191
ENSCHIG00000010939	U1
ENSCHIG00000001465
ENSCHIG00000019983
ENSCHIG00000013163	ING5
ENSCHIG00000024323	DTYMK
ENSCHIG00000018105	ATG4B
ENSCHIG00000020478	THAP4
ENSCHIG00000014554
ENSCHIG00000026381	BOK
ENSCHIG00000021875	STK25
ENSCHIG00000027255	FARP2
